# Supplementary material for: Association of the Meaningful Use Electronic Health Record Incentive Program With Health Information Technology Venture Capital Funding
Source: PubMed Central journal article supplement (PMC7093764; doi:10.1001/jamanetworkopen.2020.1402), 2020-03-24

## Supplementary Online Content

Lite S, Gordon WJ, Stern AD. Association of the meaningful use electronic health record incentive program with health information technology venture capital funding. *JAMA Netw Open*. 2020;3(3):e201402. doi:10.1001/jamanetworkopen.2020.1402

**eTable.** Funding Round Categorization

**eFigure 1.** Investment in EHR-Related and HCIT Companies

**eFigure 2.** Parallel Trends Analysis

This supplementary material has been provided by the authors to give readers additional information about their work.

eTable. Funding Round Categorization

---

| Group           | Round Type (from Capital IQ)                          |
|-----------------|-------------------------------------------------------|
| Seed            | Angel, Accelerator, Crowd-Funding, Pre-Seed, Seed     |
| Early           | Pre-Series A, Series A                                |
| Growth / Late   | Pre-Series B, Series B, Series C, Series D, ..., PIPE |
| <i>Excluded</i> | Venture, Debt, Bridge                                 |

---

eFigure 1: Investment in EHR-Related and HCIT Companies

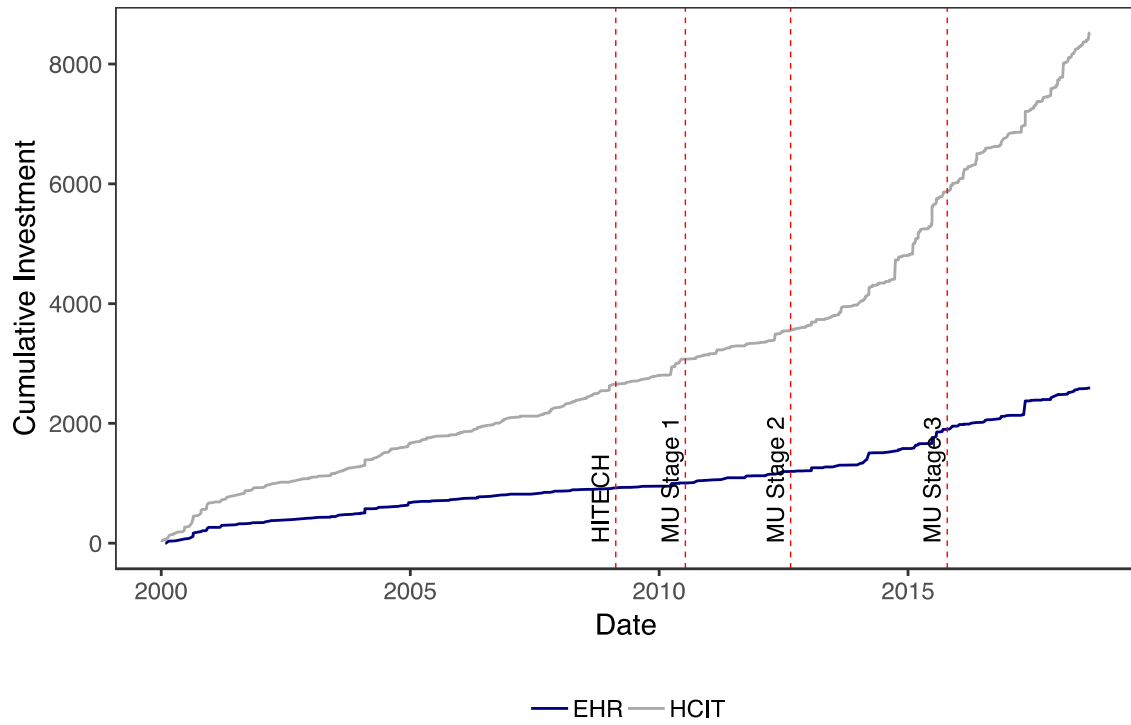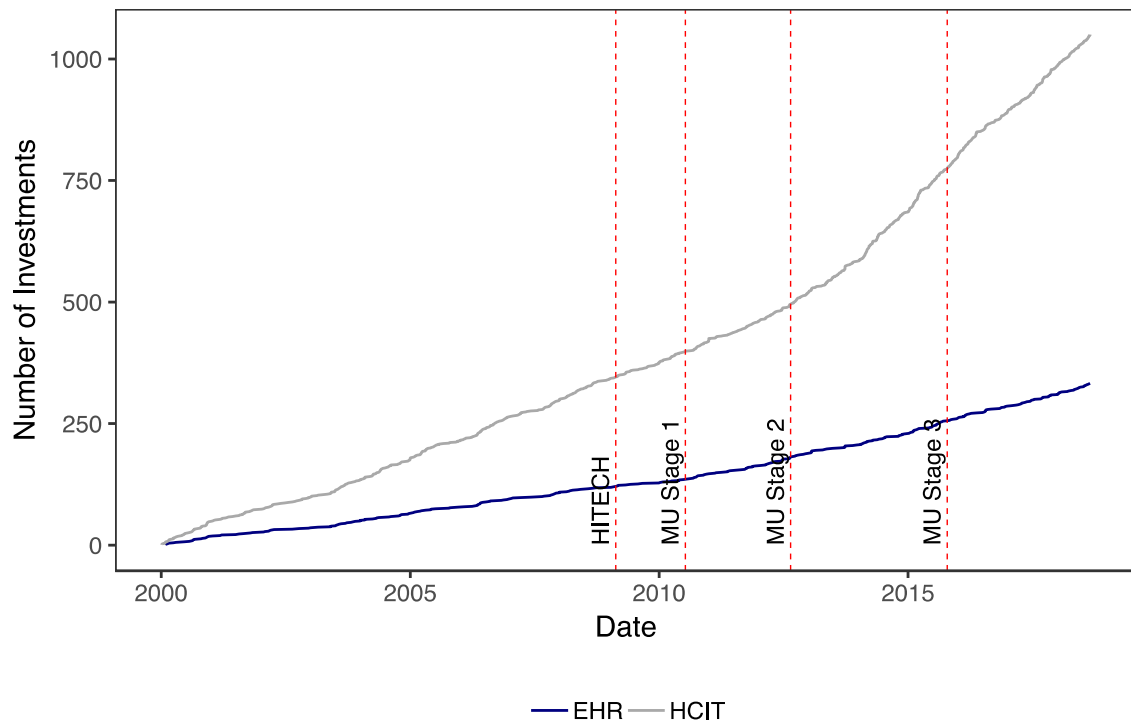

eFigure 2: Parallel Trends Analysis

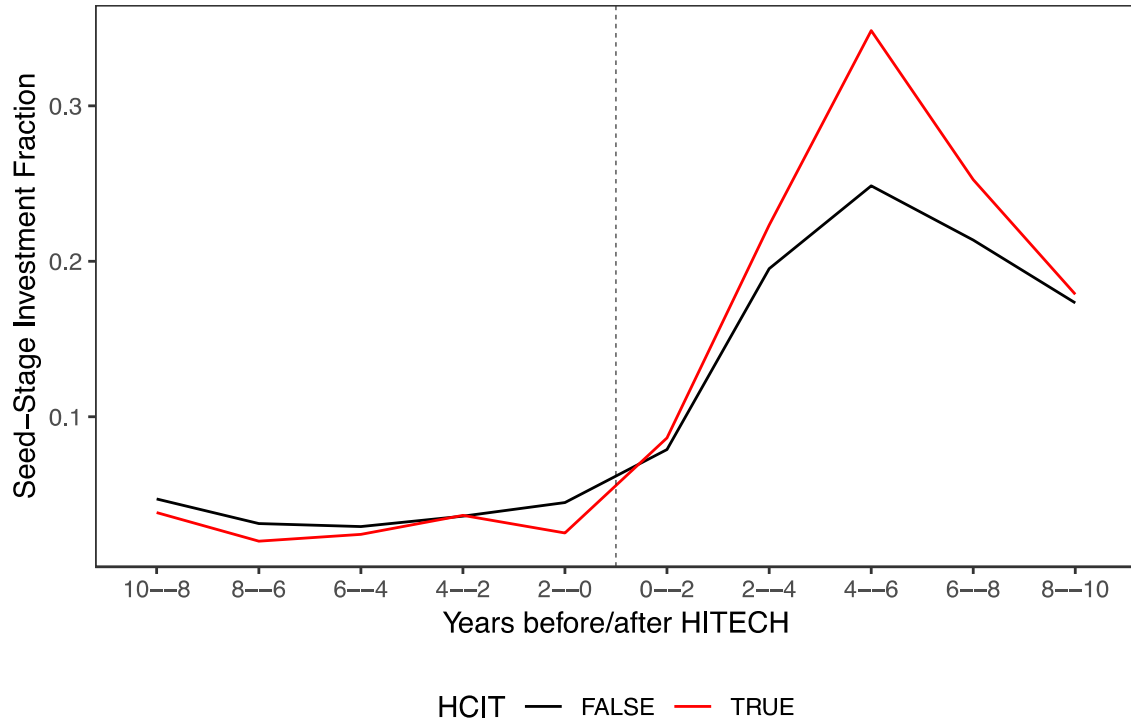

Supplement: jamanetwopen-3-e201402-s001.pdf [file jamanetwopen-3-e201402-s001.pdf]
